# Supplementary material
Source: bioRxiv or medRxiv preprint supplement (https://www.biorxiv.org/highwire/filestream/91539/field_highwire_adjunct_files/0/290700-1.pdf)
Supplement: Supplementary file [file 290700-1.pdf]

Figure S1

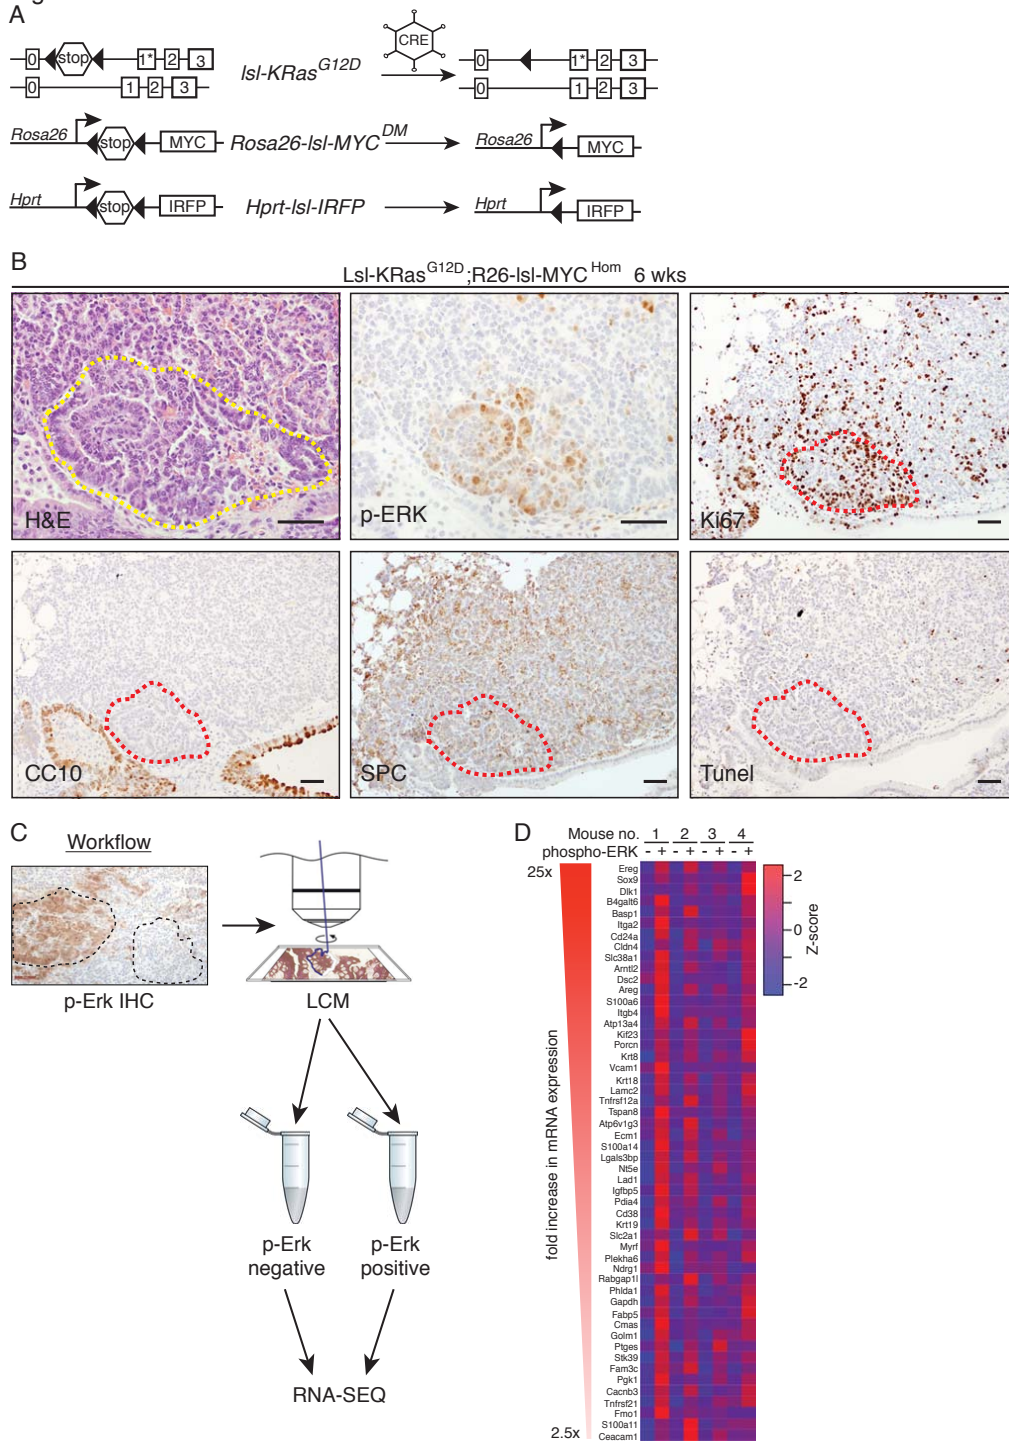

## Supplemental Figures

### Figure S1: Characterization of KM lung tumors. Relates to main figures 1, 2 & 3.

**A)** Schematic of allele activation: Adult (8-10 week old) mice bearing the indicated conditional alleles were administered recombinant Adeno-CRE via intra-nasal installation and maintained for the durations indicated in the text, or until symptomatic. **B)** Serial sections from an  $Isl-KRas^{G12D};R26-IsI-MYC^{Hom}$  mouse lung harvested at 6 weeks post induction (PI) and stained with the indicated antibodies or TUNEL stained. Scale bars = 50 $\mu$ M. Images are representative of lungs from at least 5 mice analyzed for each stain. Outline demarcates the approximate p-Erk positive tumour region. **C)** Workflow of laser-capture micro-dissection (LCM) of formalin fixed paraffin-embedded KM lung tumors. Serial sections were first stained for p-Erk expression to identify p-Erk<sup>High</sup> and p-Erk<sup>Low</sup> tumor regions. Cresyl violet-stained adjacent sections were then subject to LCM upon identification of the corresponding regions. Messenger RNA was purified from harvested material and analysed by RNA-SEQ. **D)** Heatmap of selected gene expression in p-Erk low (-) and p-Erk high (+) tumors from 4 individual mice, ranked by order of mean fold-increase in expression (range = 24.82 - 2.5). Significantly modulated genes were selected from the RNA-SEQ dataset based on evidence of gene amplification or mRNA overexpression in published human lung cancer datasets, accessed via cBioPortal and Oncomine.

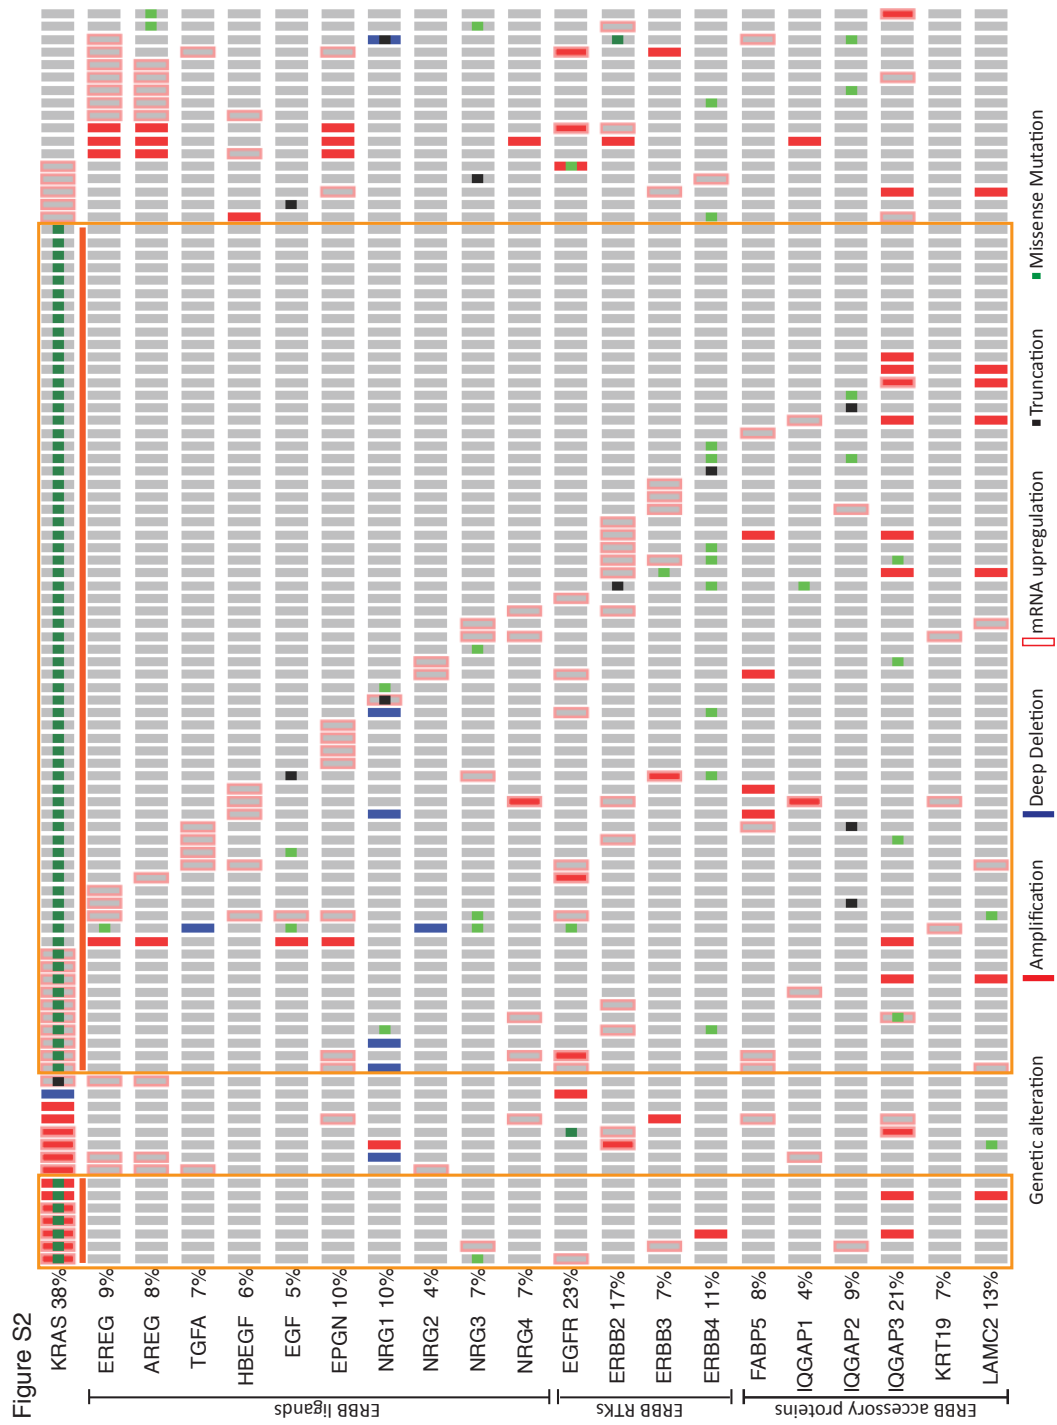

**Figure S2: Genomic alterations and expression data of ERBB network genes in human KRAS mutant Lung Adenocarcinoma. Relates to main figure 3.**

Each column represents an individual tumor. Genes are grouped as ERBB ligands, ERBB RTKs and ERBB accessory proteins. Percentages refer to the frequency of alteration across all lung adenocarcinoma. Orange bars (top) emphasize cases of KRAS mutation (N=74, of which 73 are codon 12 mutant) while orange boxes outline the ERBB network in the same cases. Green dots indicate coding alterations; black dots indicate truncation mutations; solid red bars denote gene amplification; open red bars show elevated mRNA expression; solid blue bars indicate deep deletion. Grey bars indicate no detected alteration. Data are derived from the published TCGA Lung Adenocarcinoma cohort as accessed via cBioportal (truncated at the right).

Figure S3

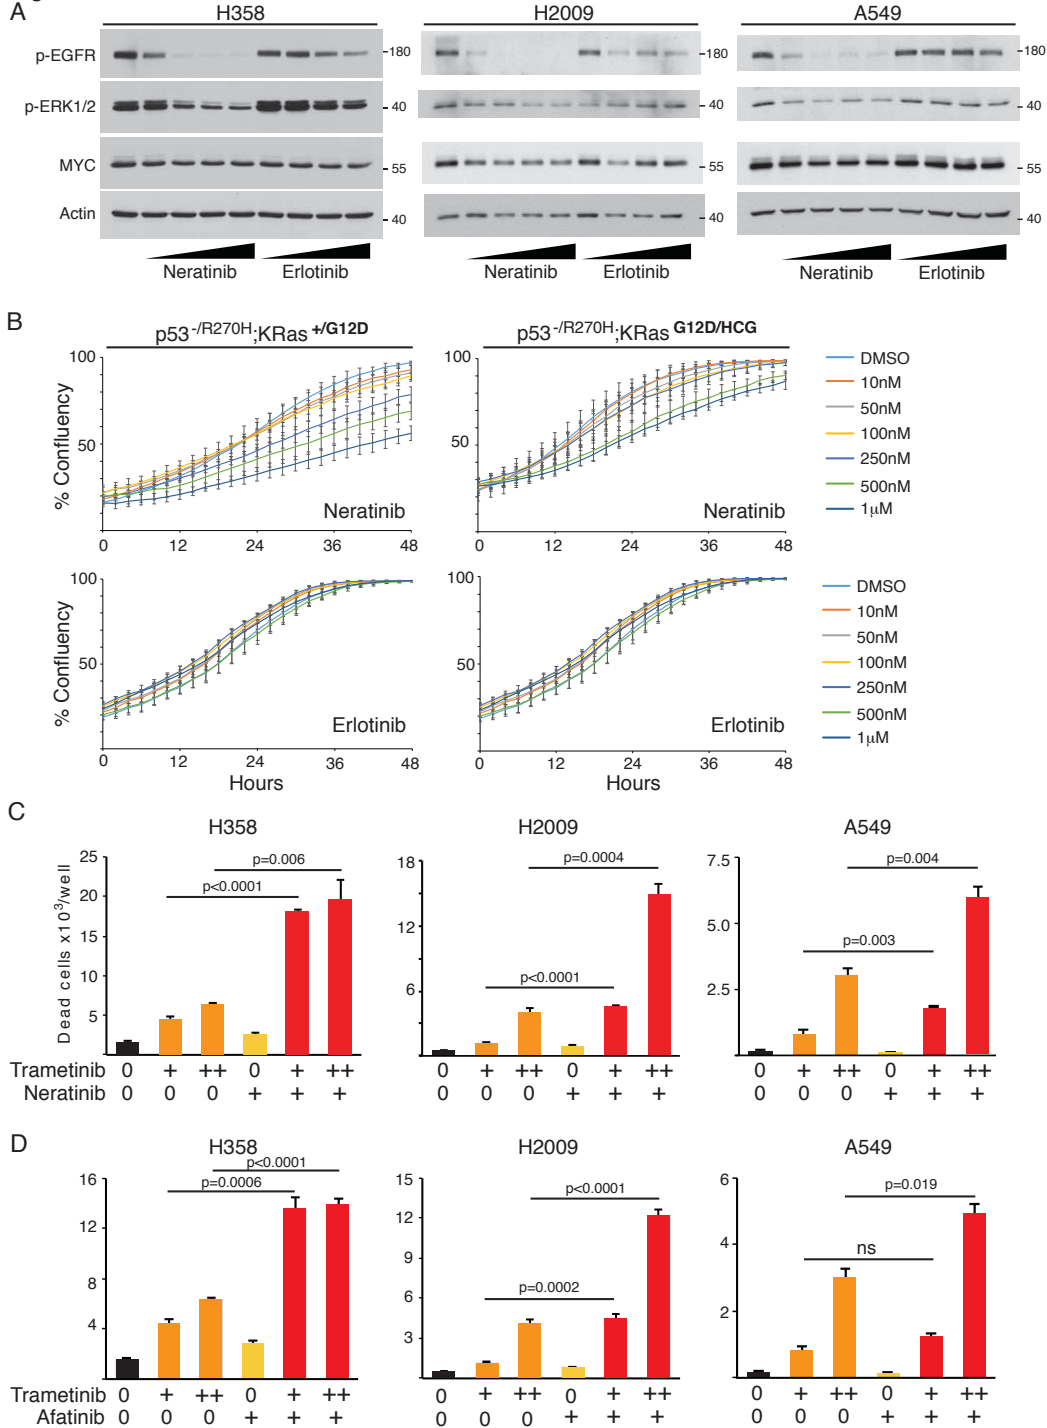

**Figure S3: ERBB blockade enhances MEK inhibitor induced NSCLC cell death. Relates to main figures 4 & 5.**

**A)** Lysates from KRAS mutant NSCLC cells treated with increasing doses of Erlotinib or Neratinib were subject to immunoblotting with the indicated antibodies. **B)** Growth curves of KRas<sup>G12D/wt</sup>;p53<sup>R270H/-</sup> (single copy KRas<sup>G12D</sup>) and KRas<sup>G12D/HCG</sup>;p53<sup>R270H/-</sup> (high copy gain KRas<sup>G12D</sup>) murine lung tumor lines treated with the indicated doses of Neratinib (upper panels) or Erlotinib (lower panels) and monitored by Incucyte time-lapse. Error bars denote SD of technical triplicates. Data are representative of at least 2 independent experiments. **C)** Quantification of cell death in KRAS mutant human lung cancer lines upon treatment with Neratinib (250nM) alone or in combination with 2 doses (10nM & 100nM) of the MEK inhibitor Trametinib. Mean and SEM of 3 biological replicates from a representative experiment shown. ANOVA followed by Tukey test; ns = not significant. Lower doses of drug were used for H358 cells (50nM Neratinib and 50nM Trametinib) due to their greater sensitivity to either drug alone. **D)** Quantification of cell death in KRAS mutant human lung cancer lines upon treatment with Afatinib (1μM) alone or in combination with 2 doses (10nM & 100nM) of the MEK inhibitor Trametinib. Mean and SEM of 3 biological replicates from a representative experiment shown. ANOVA followed by Tukey test; ns = not significant. Lower doses of drug were used for H358 cells (50nM Afatinib and 50nM Trametinib) due to their greater sensitivity to either drug alone.

Figure S4  
A

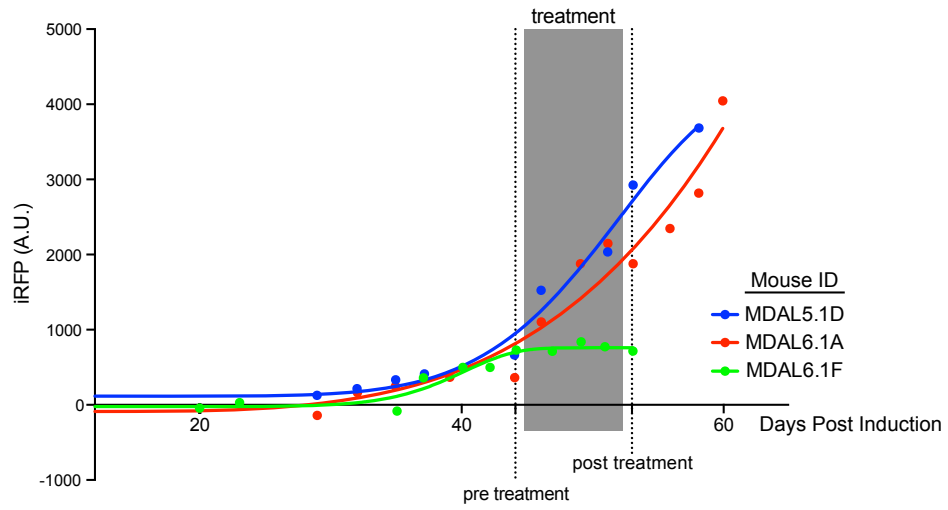

B

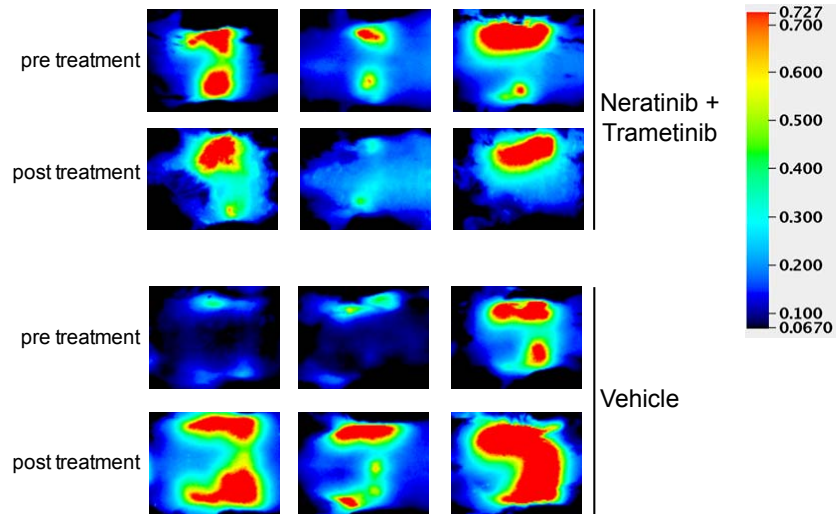

**Figure S4: Longitudinal in-vivo imaging of nascent lung tumors. Relates to main figure 5.**

**A)** KM mice were interbred with *Hprt-lsl-iRFP*, induced with Adeno-CRE as before, and monitored for tumor growth using a Licor PEARL imager. Circles indicate days of imaging. Data are normalized to background fluorescence for each mouse, set to 0, and signal intensity curves were calculated using the Weibull growth equation. Upon consistent detection of pulmonary fluorescence, mice were administered the combination of Neratinib + Trametinib (MDAL6.1F), or vehicle control (MDAL5.1D & 6.1A) for 1 week (grey bar). The presence of tumors was confirmed upon sacrifice. **B)** Representative images of mice as from (A) showing fluorescent detection of iRFP-labeled KM tumors before and after drug (upper panels) or vehicle (lower panels) treatment. The same colorimetric scale was used for each image. Pre- and post-treatment images, separated by 9 days, are shown for each mouse.



Table S1

| Pathway                                       | Modulated during progression to p-Erk + tumors |         | Modulated by Neratinib <i>in vitro</i> |         |       |         |      |         |
|-----------------------------------------------|------------------------------------------------|---------|----------------------------------------|---------|-------|---------|------|---------|
|                                               | Rank                                           | FDR     | H358                                   |         | H2009 |         | A549 |         |
|                                               |                                                |         | Rank                                   | FDR     | Rank  | FDR     | Rank | FDR     |
| Cytoskeletal remodeling, TGF, WNT pathways    | 1                                              | 1.7e-24 | 1                                      | 2.7e-26 | 1     | 1.5e-26 | 1    | 2.3e-27 |
| Cytoskeletal remodeling                       | 2                                              | 9.0e-23 | 2                                      | 3.2e-21 | 2     | 2.1e-22 | 4    | 2.4e-22 |
| Transport - Clathrin-coated vesicle cycle     | 3                                              | 3.6e-19 | 3                                      | 2.5e-18 | 3     | 2.2e-21 | 2    | 1.4e-22 |
| Apoptosis & survival, NGF/TrkA PI3K signaling | 4                                              | 1.4e-15 | 4                                      | 4.4e-17 | 4     | 7.8e-19 | 3    | 1.6e-22 |
| Transcription, Sin3 & NuRD regulated          | 5                                              | 1.6e-15 | 8                                      | 4.9e-16 | 6     | 4.1e-17 | 6    | 4.9e-18 |
| Immune Response, IL4 signaling                | 6                                              | 9.1e-15 | 19                                     | 2.6e-13 | 14    | 6.6e-15 | 8    | 7.1e-17 |
| Cell Cycle, influence of Ras & Rho in G1/S    | 7                                              | 2.7e-14 | 11                                     | 7.8e-15 | 8     | 5.2e-16 | 7    | 5.8e-17 |
| Cell Adhesion, Chemokines & adhesion          | 8                                              | 2.8e-14 | 7                                      | 2.3e-16 | 17    | 1.5e-14 | 19   | 1.1e-13 |
| Development, TGF-beta receptor signaling      | 10                                             | 2.3e-13 | 6                                      | 2.1e-16 | 5     | 1.2e-17 | 13   | 1.2e-14 |
| Translation, regulation of EIF4F activity     | 11                                             | 3.2e-13 | 14                                     | 1.1e-13 | 13    | 6.6e-15 | 14   | 1.2e-14 |
| Development, EGFR signaling                   | 12                                             | 4.4e-13 | 12                                     | 1.9e-14 | 10    | 6.7e-16 | 11   | 4.3e-15 |
| Receptor mediated axon growth repulsion       | 13                                             | 5.4e-13 | 26                                     | 3.0e-12 | 21    | 3.0e-13 | 10   | 3.4e-15 |
| Androgen receptor activation                  | 14                                             | 5.6e-13 | 5                                      | 7.6e-17 | 16    | 1.1e-14 | 15   | 1.2e-14 |
| Epigenetic regulation of gene expression      | 16                                             | 1.6e-12 | 21                                     | 5.6e-13 | 22    | 3.4e-13 | 16   | 5.0e-14 |
| IGF family signaling in colorectal cancer     | 17                                             | 1.6e-12 | 22                                     | 5.6e-13 | 18    | 3.2e-14 | 29   | 2.2e-12 |
| TGFb-dependent induction of EMT via MAPK      | 18                                             | 1.6e-12 | 31                                     | 7.6e-12 | 25    | 7.4e-13 | 26   | 1.6e-12 |
| NGF/TrkA MAPK-mediated signaling              | 19                                             | 2.1e-12 | 9                                      | 1.3e-15 | 9     | 6.7e-16 | 9    | 9.0e-16 |
| Regulation of STK3/4 (Hippo) and YAP/TAZ      | 20                                             | 2.9e-12 | 18                                     | 2.6e-13 | 15    | 1.1e-14 | 12   | 9.4e-15 |

**Table S1: Summary of Metacore GeneGO pathway analysis. Relates to main figure 4.**

The blue shaded region demarcates pathways modulated as KM tumours progress to pErk<sup>High</sup> expression, ranked by false discovery rate (FDR). The mauve shaded region indicates the Rank and FDR of the same pathways upon treatment of the indicated KRAS mutant human NSCLC cell lines with Neratinib.
